# Supplementary material
Source: PubMed Central journal article supplement (PMC2801239)

## *UGT1A3 glucuronidates norUDCA*

**Supplemental Table 1: Characteristics of donors for human hepatocytes.**

|             | <b>Donor</b> | <b>Previous numbering</b> | <b>Gender</b> | <b>Race</b> | <b>Age (year)</b> | <b>Cause of Death</b> |
|-------------|--------------|---------------------------|---------------|-------------|-------------------|-----------------------|
| Hepatocytes | 1            | ZYZ                       | Male          | Afr.-Amer.* | 46                | Anoxia                |
|             | 2            | AAA                       | Female        | Afr.-Amer.  | 8w**              | Head trauma           |
|             | 3            | BAD                       | Male          | Caucasian   | 60                | ICH***                |

\*Afr.-Amer.: African-American; \*\*w: weeks; \*\*\*ICH: Intracerebral hemorrhage. Drug intake: none reported.

### **OTHER SUPPLEMENTAL DATA LEGEND**

#### **Supplemental Figure 1: UGT1A3 catalyzes norUDCA glucuronidation**

(A-C) Ten micrograms of commercially available baculosomes expressing human UGTs (BD Biosciences, Mississauga, Canada) were incubated with norUDCA (75µM) for 1H at 37°C.

(D-F) UGT-HK293 cells were homogenized in PBS containing 0.5 mM dithiothreitol through sonication, and 100 µg of the homogenates were incubated in the presence of norUDCA (75µM) for 1H at 37°C.

The formation of norUDCA-G1 (A&D), -G2 (B&E) and -23G (C&F) was analyzed by LC-MS/MS. Data represent the mean±S.D. of three different experiments performed in triplicate.

Previous immunoblot analyses<sup>20</sup> established that the UGT protein content in UGT1A3-baculosomes was lower compared to UGT1A8 and UGT1A10, demonstrating that the high glucuronidation activity was not a consequence of higher UGT1A3 protein levels in the preparation.

#### **Supplemental Figure 2: Rifampicin treatment increases CYP3A4 mRNA levels in the human hepatocytes preparation used in the present study.**

Primary human hepatocytes from 3 donors (Supplemental Data 1) were treated for 48H with DMSO (0.1%) or Rifampicin (20µM). CYP3A4 mRNA levels were measured by real-time RT-PCR, and expressed relative to control (vehicle) set as 1. UGT1A3 mRNA expression was normalized with 28S. Values are means ± SEM. Statistically significant differences between control and treated cells are indicated by asterisks (Student t test: \*\*\*: p < 0.001).

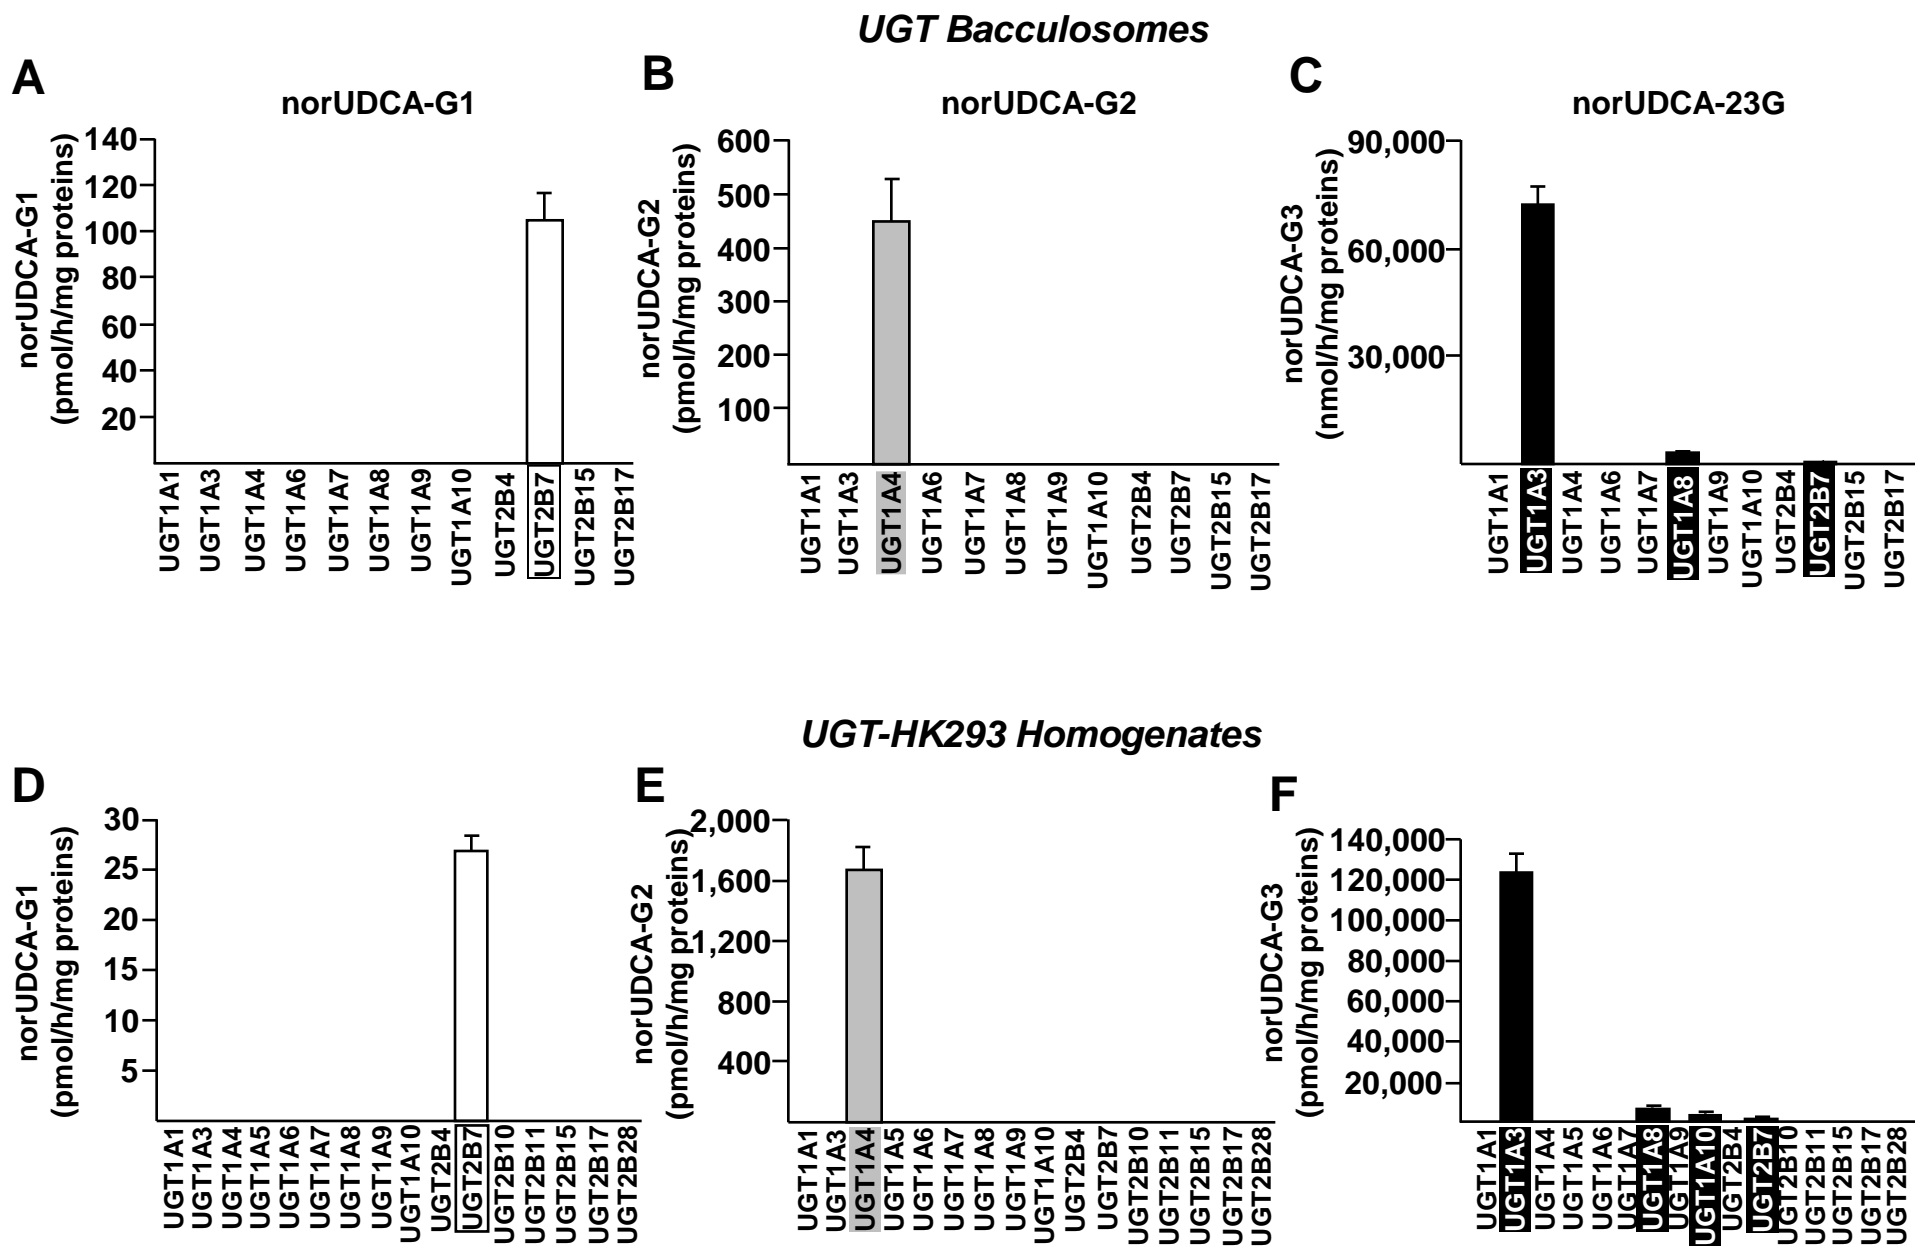

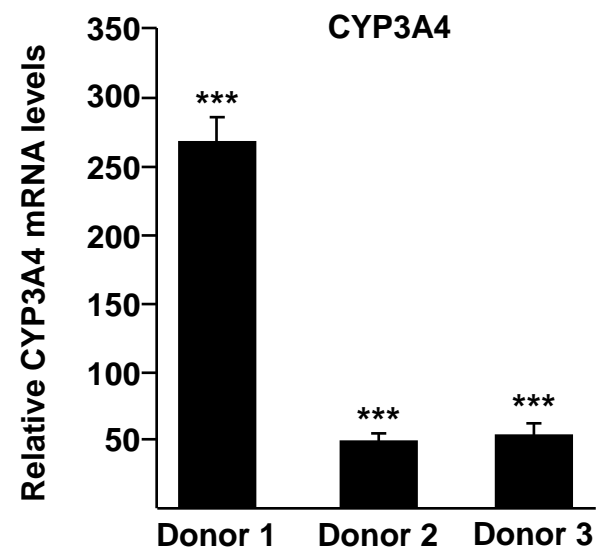

Supplement: supp_M109.073908_M109_073908_0139_Suppl_data.pdf [file supp_M109.073908_M109_073908_0139_Suppl_data.pdf]
